# Supplementary material for: The intralaminar thalamus: a review of its role as a target in functional neurosurgery
Source: PubMed Central journal article supplement (PMC10244065; doi:10.1093/braincomms/fcad003), 2023-02-02
Supplement: fcad003_supplementary_data.pdf [file fcad003_supplementary_data.pdf]

## SUPPLEMENTARY MATERIAL: STUDIES ON ABLATION AND DBS OF THE INTRALAMINAR NUCLEI OF THE THALAMUS

### 1. STUDIES ON ABLATION/DBS OF THE INTRALAMINAR THALAMUS IN PAIN

#### 1.1 Ablation (for review of early studies <1980 on ablation for pain, see Tasker et al.)

| Year                    | Authors            | Type of patients                                                               | Type of ablation | n (% male) | Target          | Follow-up        | Results                                                                                                                                                         |
|-------------------------|--------------------|--------------------------------------------------------------------------------|------------------|------------|-----------------|------------------|-----------------------------------------------------------------------------------------------------------------------------------------------------------------|
| 1980                    | Steiner et al.     | Cancer pain                                                                    | Gamma Knife      | 52 (N/A%)  | CM-Pf           | 1 to >36 months  | Good pain relief (8), moderate pain relief (18), no significant pain relief (24).                                                                               |
| 1982 <sup>1</sup>       | Niizuma et al.     | Central (thalamic) pain (17), PLP (1)                                          | Lesion electrode | 18 (78%)   | CM              | 9 months-6 years | Effective in 56% of patients: 5/18 complete relief of pain, 5/18 patients partial relief of pain (limited duration of pain relief: half a year at the longest). |
| 1993                    | Jeanmonod et al.   | Various (neurogenic pain)                                                      | Lesion electrode | 45 (N/A%)  | Medial thalamus | ±14 months       | 67% of patients reached 50-100% pain relief. 29% of patients had complete relief of pain.                                                                       |
| 1995                    | Young et al.       | Spinal disorders (10), central (thalamic) pain (3), PHN (3), FP (1), other (3) | Gamma Knife      | 20 (N/A%)  | Medial thalamus | 1-22 months      | 65% of patients experienced excellent or good pain relief.                                                                                                      |
| 1995                    | Hariz & Bergenheim | Central (thalamic) pain (5), cancer pain (2), FP (2)                           | Lesion electrode | 9 (N/A%)   | CM              | ±16 months       | 3/5 patients with central (thalamic) pain, 1/2 with cancer pain, and 1/2 with FP had beneficial results (≥ 50% reduction in pain).                              |
| 1996 <sup>2</sup> /2001 | Young et al.       | Various (intractable pain and FP)                                              | Gamma Knife      | 61 (N/A%)  | IL              | ±74 months       | 32/61 patients (53%) achieved a ≥50% reduction in visual analog scale/pain scores.                                                                              |

|                   |                  |                                                                            |                    |           |       |            |                                                                                                                                                                                                 |
|-------------------|------------------|----------------------------------------------------------------------------|--------------------|-----------|-------|------------|-------------------------------------------------------------------------------------------------------------------------------------------------------------------------------------------------|
| 2001 <sup>3</sup> | Jeanmonod et al. | Various (chronic peripheral/central neurogenic pain)                       | Lesion electrode   | 96 (N/A%) | CL    | ±45 months | 53% of patients benefited from a relief ≥50%. Complete relief in 19%.                                                                                                                           |
| 2006              | Keep et al.      | Central (thalamic) pain                                                    | Gamma Knife        | 1 (100%)  | CM    | 7 years    | Significant improvement in pain without need for medication.                                                                                                                                    |
| 2018              | Urgosik et al.   | Different types of TP (23) central (thalamic) pain (4), PLP (1), other (2) | Gamma Knife        | 30 (33%)  | CM-Pf | ±24 months | 13/30 (43%) had an initial successful result (pain intensity ≤50%) with 1 of these patients being completely pain-free. Pain recurred in 4 patients (31%) after 24 months.                      |
| 2020              | Franzini et al.  | TP (4), posttraumatic cord/roots (2), PHN (1), other (1)                   | Gamma Knife        | 8 (50%)   | CL    | ±24 months | At the last follow-up visits, 5/8 patients reported ≥ 50% VAS pain reduction. Mean VAS-score significantly reduced after 24 months. Pain had recurred in 2 patients.                            |
| 2020              | Gallay et al.    | TP                                                                         | Focused ultrasound | 8 (63%)   | CL    | ±53 months | Mean pain relief: 51% at 3 months, 71% at 1 year and 78% at the longest follow-up. This represents 63% good outcomes (pain relief ≥ 50%) at 3 months, 88% at 1 year and 100% at last follow-up. |

**Legend:** CM = centromedian nucleus; CM-Pf = centromedian-parafascicular complex; CL = central lateral nucleus; FP = facial pain; IL = intralaminar nuclei; N/A = Not Available; PHN = post-herpetic neuralgia; PLP = phantom limb pain; TP = trigeminal pain.

## 1.2 DBS

| Year | Authors | Type of patients | n (% male) | Target | Stimulation parameters | Follow-up | Results |
|------|---------|------------------|------------|--------|------------------------|-----------|---------|
|------|---------|------------------|------------|--------|------------------------|-----------|---------|

|                             |                      |                                                                                                           |          |                                     |                                                   |                                                    |                                                                                                                                                                                     |
|-----------------------------|----------------------|-----------------------------------------------------------------------------------------------------------|----------|-------------------------------------|---------------------------------------------------|----------------------------------------------------|-------------------------------------------------------------------------------------------------------------------------------------------------------------------------------------|
| 1976 <sup>4</sup>           | Boethius et al.      | Post-traumatic cord/roots (1), PLP (1), FP (2), other (1)                                                 | 5 (N/A%) | CM-Pf (5) (including other targets) | 10-100 Hz / 0.15-7 mA / 0.1-0.3 ms                | 6 months (1), 6 weeks (4)                          | Pain-free (40%), reduced dysesthesia (40%), no relief (20%).                                                                                                                        |
| 1979 <sup>5</sup>           | Thoden et al.        | Chronic intractable pain (N/A)                                                                            | 7 (N/A%) | CM-Pf (and parts of MD)             | 10-100 Hz / Variable amplitude / 50 - 350 $\mu$ s | N/A                                                | (Pain reducing) paresthesia's in contralateral half of body and the area of pain.                                                                                                   |
| 1980                        | Ray & Burton         | FBS (11), Cancer pain (6), post-traumatic cord/roots (5), FP (2), thalamic stroke (1), PLP (1), other (2) | 28 (54%) | CM-Pf                               | N/A                                               | $\pm$ 14 months                                    | 75% experienced $\geq$ 50% reduction in pain. In FBS 64% of patients, cancer pain 100%, post-traumatic cord/roots 80%, FP 50%, thalamic stroke 100%, PLP 0%, and other 100% effect. |
| 1980                        | Andy                 | Pain associated with dyskinesia's                                                                         | 3 (33%)  | CM-Pf                               | 25-125 Hz / 6-20 V / 0.1-0.5 ms                   | >3 months (1), N/A (2)                             | Total pain relief (2), sufficient pain relief (1).                                                                                                                                  |
| 1983 <sup>6</sup>           | Andy                 | Thalamic stroke (2), post-traumatic cord/roots (1), other (2)                                             | 5 (40%)  | CM-Pf/other IL                      | 50 Hz / 0.1-5.0 V / 200 $\mu$ s                   | $\geq$ 12 months (1), $\geq$ 7 months (1), N/A (3) | Total relief of pain (3), episodes of recurring pain (1), controllable pain (1).                                                                                                    |
| 1995                        | Hariz & Bergenheim   | Post-traumatic cord/roots (2), FP (1), thalamic stroke (1)                                                | 4 (N/A%) | CM                                  | N/A                                               | $\pm$ 16 months                                    | 2 of 4 (with post-traumatic cord/roots and thalamic stroke) had successful pain relief ( $\geq$ 50% reduction in pain).                                                             |
| 2001 <sup>7</sup> /<br>2002 | Krauss et al.        | Chronic neuropathic pain (N/A)                                                                            | 12 (50%) | CM-Pf                               | 130 Hz / variable amplitude / 180-210 $\mu$ s     | N/A                                                | Significant improvement in pain scores relative to pre-operative conditions (not further specified).                                                                                |
| 2016                        | Sims-Williams et al. | TP, anaesthesia dolorosa                                                                                  | 3 (33%)  | CM-Pf and PAG                       | 70-150 Hz for CM-Pf / 5-10 Hz for PAG             | 19 $\pm$ 8 months                                  | Reduction in mean pain score by 56% with PAG and 67% with CM-Pf stimulation.                                                                                                        |
| 2017 <sup>8</sup>           | Hollingworth         | TP, anaesthesia dolorosa (1), PLP (1), post-stroke (1)                                                    | 3 (N/A%) | CM-Pf and PAG                       | 128-132 Hz for CM-Pf / 10 Hz for PAG / 3,5-4,5mA  | 3 years                                            | Improvement of mean VAS scores and return to daily activities.                                                                                                                      |

|      |                                           |                                                                            |          |       |                              |                                     |                                                                                                                             |
|------|-------------------------------------------|----------------------------------------------------------------------------|----------|-------|------------------------------|-------------------------------------|-----------------------------------------------------------------------------------------------------------------------------|
| 2021 | Abdallat et al. (follow-up Krauss et al.) | (Thalamic) stroke/hemorrhage (4), herpes zoster (3), trauma (4), other (9) | 20 (50%) | CM-Pf | 131 Hz / 2.5 V / 210 $\mu$ s | $\pm$ 63 months; range 3-180 months | Improvement of VAS average pain score by $\geq$ 50% in 50% of patients at last follow-up and $\geq$ 30% in 65% of patients. |
|------|-------------------------------------------|----------------------------------------------------------------------------|----------|-------|------------------------------|-------------------------------------|-----------------------------------------------------------------------------------------------------------------------------|

**Legend:** CM = centromedian nucleus; CM-Pf = centromedian-parafascicular complex; FBS = failed back surgery; FP = facial pain; IL = intralaminar nuclei; MD = medial dorsal nucleus; N/A = Not Available; PLP = phantom limb pain; TP = trigeminal pain.

## 2. STUDIES ON ABLATION/DBS OF THE INTRALAMINAR THALAMUS IN EPILEPSY

### 2.1 Ablation (lesion electrode)

| Year | Authors               | n (% male) | Type of epilepsy/seizure                      | Target | Follow-up       | Results                                                             |
|------|-----------------------|------------|-----------------------------------------------|--------|-----------------|---------------------------------------------------------------------|
| 2021 | Aguado-Carillo et al. | 6 (33%)    | Primarily GE (6) of which LGS (1), or MFE (1) | CM     | $\pm$ 28 months | Reduction of 79-98% in GS. Focal aware seizures remained unchanged. |

**Legend:** CM = centromedian nucleus; GE = generalized epilepsy; GS = generalized seizures; LGS = Lennox-Gastaut syndrome; MFE = multifocal epilepsy;

### 2.2 DBS

| Year              | Authors        | n (% male) | Type of epilepsy/seizure | Target | Stimulation parameters          | Follow-up | Results                                           |
|-------------------|----------------|------------|--------------------------|--------|---------------------------------|-----------|---------------------------------------------------|
| 1987 <sup>9</sup> | Velasco et al. | 5 (60%)    | TC and CP                | CM     | 60-100 Hz / 0.8-2.0 mA / 0.1 ms | 3 months  | 80-100% reduction in TC, 60-100% reduction in CP. |

|      |                 |           |                                                                                                          |    |                                            |                                                                             |                                                                                                                                  |
|------|-----------------|-----------|----------------------------------------------------------------------------------------------------------|----|--------------------------------------------|-----------------------------------------------------------------------------|----------------------------------------------------------------------------------------------------------------------------------|
| 1992 | Fisher et al.   | 7 (43%)   | TC (5) of which LGS (2), TS (1), and CP (1)                                                              | CM | 65 Hz / 0.5-10 V / 90 $\mu$ s              | 9-month cross-over phase and long-term open-label period of $\pm$ 8 months. | $\geq$ 50% improvement in GS in >50% of patients.                                                                                |
| 1993 | Velasco et al.  | 23 (61%)  | TC (9), PM (3), CP (5), LGS (6)                                                                          | CM | 60 Hz / 8-15 V (400-1250 $\mu$ A) / 1.0 ms | 9-month cross-over                                                          | Significant reduction in TC and LGS, non-significant reduction in PM, no change in CP.                                           |
| 1995 | Velasco et al.  | 5 (40%)   | Various forms of TC, CP, and AA seizures                                                                 | CM | 65 Hz / 450-800 $\mu$ A / 0.09 ms          | 7-33 months                                                                 | TC seizures decreased, almost disappearing in all patients. Significant reduction in AA. No change in CP.                        |
| 2000 | Velasco et al.  | 13 (N/A%) | LGS (8) with AA (8), TC (7) and CP (1). FS with secondary generalization (5), CP (4), TC (4), and AA (2) | CM | 60 Hz / 4-6 V                              | $\pm$ 41 months                                                             | Mean seizure reduction of 82% in LGS-patients. TC and AA seizures also significantly improved. No significant improvement in CP. |
| 2006 | Velasco et al.  | 13 (N/A%) | LGS with TC (11) and AA (13)                                                                             | CM | 130 Hz / 2-3 V (400-600 $\mu$ A) / 0.45 ms | $\pm$ 46 months                                                             | 80% seizure reduction. TC disappeared in 55% of patients and AA disappeared in 27% of patients.                                  |
| 2009 | Cukiert et al.  | 4 (N/A%)  | LGS, LLS, and IGE                                                                                        | CM | 130 Hz / 2 V / 30 $\mu$ s                  | 1 year (n = 2)<br>2 years (n = 2)                                           | Seizure frequency reduction of 65-95%.                                                                                           |
| 2013 | Valentin et al. | 11 (82%)  | GE (6) with TC (6) and absence seizures (5). FLE (5) with CP (5) and SPS (1).                            | CM | 60 Hz / up to 5 V / 90 $\mu$ s             | 9-month cross-over phase, followed by 5 month ON-phase                      | >50% reduction in 80% of GE and 40% of FLE patients.                                                                             |
| 2016 | Son et al.      | 14 (36%)  | Multilobar epilepsy (10) and LGS (4)                                                                     | CM | 120-130 Hz / 1-2.6 V / 90-150 $\mu$ s      | $\pm$ 18.2 months                                                           | Mean seizure-reduction of 68%. 79% achieved >50% improvement (100% of LGS and 70% of multilobar epilepsy patients).              |

|      |                       |          |                                         |                  |                                       |                 |                                                                                                                                    |
|------|-----------------------|----------|-----------------------------------------|------------------|---------------------------------------|-----------------|------------------------------------------------------------------------------------------------------------------------------------|
| 2017 | Kim et al.            | 10 (40%) | LGS (3) and MFE (7)                     | CM               | 130 Hz / 1.5-2.0 V / 90 $\mu$ s       | $\pm$ 21 months | Mean seizure-reduction of 72% in the total patient group, 52% in LGS patients and 80% in MFE patients.                             |
| 2020 | Cukiert et al.        | 20 (65%) | GE (LGS or LLS)                         | CM               | 130 Hz / 3-4.5 V / 300 $\mu$ s        | 2.55 years      | $\geq$ 50% reduction in 90% of patients.                                                                                           |
| 2021 | Alcala-Zermeno et al. | 16 (43%) | Combined GE and FE (7), GE (6), FE (3). | CM<br>CM/A<br>NT | 2-100 Hz / 1.0-6.3 V / 60-210 $\mu$ s | $\pm$ 80 months | Mean significant seizure-reduction of 58%. $\geq$ 50% reduction in 63% of patients. No significant difference in CM versus CM/ANT. |

**Legend:** AA = atypical absence; ANT = anterior nucleus; BL = baseline; CM = centromedian nucleus; CP = complex partial seizures; FE = focal epilepsy FLE = frontal lobe epilepsy; FS = focal seizures; GE = generalized epilepsy; GS = Generalized seizures; IGE = idiopathic generalized epilepsy; LGS = Lennox-Gastaut syndrome; MFE = multifocal epilepsy Myo = myoclonic seizures; PM = partial motor, SPS = simple partial seizure; TA = typical absence seizures; TC = tonic-clonic seizures; TS = tonic seizures; MFE = multifocal epilepsy; MFS = multifocal seizures; N/A = not available.

### 3. STUDIES ON ABLATION/DBS OF THE INTRALAMINAR THALAMUS IN GILLES DE LA TOURETTE

#### 3.1 Ablation (lesion electrode)

| Year | Authors             | n (% male)                       | Target                       | Follow-up                                    | Results                                                                                  |
|------|---------------------|----------------------------------|------------------------------|----------------------------------------------|------------------------------------------------------------------------------------------|
| 1970 | Hassler & Dieckmann | 3 (66.7%)                        | CM-Spv-Voi (2)<br>CM-Spv (1) | N/A                                          | 100%, 90%, and 70% reduction in tics.                                                    |
| 1973 | Hassler & Dieckmann | 6 (additional to 1970)<br>(N/A%) | CM-Spv-Voi                   | N/A                                          | 50-100% reduction in tics.                                                               |
| 1987 | Cappabianca et al.  | 4 (75%)                          | IL and MD                    | > 1 year (2), 2 years (1), several years (1) | Temporary improvement (2), complete regression (1), slight reduction in compulsions (1). |

|                                                                                                                                                                                                                                   |              |                        |                           |                                           |                                                       |
|-----------------------------------------------------------------------------------------------------------------------------------------------------------------------------------------------------------------------------------|--------------|------------------------|---------------------------|-------------------------------------------|-------------------------------------------------------|
| 2001                                                                                                                                                                                                                              | Babel et al. | 6 (50%) of<br>16 (69%) | Various (including<br>LM) | Mean of 12 years<br>(2 lost at follow-up) | Reduction of 61% in vocal tics and 69% in motor tics. |
| <p><b>Legend:</b> CM = centromedian nucleus; IL = intralaminar nucleus; LM = lamella medialis thalamus; MD = medial dorsal nucleus; N/A = not available; Spv = substantia periventricularis; Voi = ventralis-oralis internus.</p> |              |                        |                           |                                           |                                                       |

### 3.2 DBS

| Year                         | Authors                           | n (% male)    | Target                                                      | Stimulation parameters                                                             | Follow-up                                                  | Results                                                                                                                                         |
|------------------------------|-----------------------------------|---------------|-------------------------------------------------------------|------------------------------------------------------------------------------------|------------------------------------------------------------|-------------------------------------------------------------------------------------------------------------------------------------------------|
| 1999                         | Vandewalle et al.                 | 1 (100%)      | CM-Spv-Voi                                                  | 130 Hz / 1.5 V / 450 $\mu$ s                                                       | 1 year                                                     | Abolishment of tics.                                                                                                                            |
| 2003                         | Visser-Vandewalle et al.          | 3 (100%)      | CM-Spv-Voi                                                  | 65 or 100 Hz / 2.2-3.0 V / 210 $\mu$ s                                             | 27 months                                                  | Mean reduction of 82% in tics.                                                                                                                  |
| 2006                         | Ackermans et al.                  | 2 (100%)      | CM-Spv-Voi (1),<br>CM-Spv-Voi and<br>GPi stimulation<br>(1) | Patient 1: 130 Hz / 6.4 V / 120 $\mu$ s<br>Patient 2: 170 Hz / 3.1 V / 210 $\mu$ s | 1 year                                                     | Substantial reduction in tics.                                                                                                                  |
| 2007 <sup>10</sup>           | Maciunas et al.                   | 5 (100%)      | CM-Spv-Voi                                                  | 130-185 Hz / 3.5 or 3.6 V / 90-210 $\mu$ s                                         | 1 month RCT,<br>3 months<br>unblinded                      | 3/5 patients experienced a significant reduction in all primary and secondary outcomes (including YGTSS).                                       |
| 2008 <sup>11</sup>           | Welter et al.                     | 3 (33%)       | CM-Pf                                                       | 130 Hz / 1.5-1.7 V / 60 $\mu$ s                                                    | 2 months                                                   | 45% mean reduction in YGTSS                                                                                                                     |
| 2008 <sup>12</sup><br>(2012) | Servello et al.<br>(Porta et al.) | 18<br>(83.3%) | CM-Pf-Vo                                                    | 120-130 Hz / 2.5-4 mV / 90-210 $\mu$ s                                             | 3-18 months,<br>(5-6 year<br>follow-up by<br>Porta et al.) | All patients responded to stimulation. Significant reduction in tic severity, obsessive-compulsive behaviors, anxiety, and depressive symptoms. |

|                    |                         |            |                             |                                                                             |                     |                                                                                                          |
|--------------------|-------------------------|------------|-----------------------------|-----------------------------------------------------------------------------|---------------------|----------------------------------------------------------------------------------------------------------|
| 2010 <sup>13</sup> | Ackermans et al.        | 2 (100%)   | CM-Spv-Voi                  | Patient 1: 130 Hz / 1.5-1.8 V / 90 µs<br>Patient 2: 100 Hz / 8.5 V / 150 µs | 10 years<br>6 years | 92.6% improvement in YGTSS,<br>78% improvement in YGTSS.                                                 |
| 2011 <sup>14</sup> | Ackermans et al.        | 6 (100%)   | CM-Spv-Voi                  | 70-130 Hz / 1.0-7.3 V / 60-210 µs                                           | 1 year              | 49% mean reduction in YGTSS.                                                                             |
| 2011               | Kaido et al.            | 3 (33.3%)  | CM-Pf-Vo                    | 80-130 Hz / 2.1-3.2 V / 180-210 µs                                          | 14-21 months        | 61% mean reduction in YGTSS.                                                                             |
| 2012               | Maling et al.           | 5 (40%)    | CM                          | 100-149.2 Hz / 1-4.50 mA / 80–240 µs                                        | 6 months            | YGTSS improvements of respectively 1%, 41%, 33%, 32%, and 18%.                                           |
| 2012 <sup>15</sup> | Savica et al.           | 3 (66.7%)  | CM-Pf                       | 107-130 Hz / 2.5-4.1 V / 90-120 µs                                          | 1 year              | 70% mean reduction in YGTSS.                                                                             |
| 2013 <sup>16</sup> | Okun et al.             | 5 (40%)    | CM                          | 125 Hz / 1.0-4.5 mA / 80-200 µs                                             | 6 months            | 50% mean reduction in YGTSS.                                                                             |
| 2016               | Testini et al.          | 11 (73%)   | CM-Pf                       | 100 Hz / 2-4 V / 120 us                                                     | >2 months           | 54% mean reduction in YGTSS.                                                                             |
| 2018               | Molina et al.           | 1 (100%)   | CM-Pf                       | 125 Hz / 3.5 mA / 120 µs (RNS)                                              | 12 months           | 48% improvement in YGTSS.                                                                                |
| 2018               | Dowd et al.             | 13 (N/A %) | CM-Voi                      | 130 Hz / 1-2 V / 90 us                                                      | 7 years             | 37% improvement in YGTSS after operation and 50% at last follow-up.                                      |
| 2018               | Martinez-Ramirez et al. | 93 (78.4%) | CM; vs am-GPi (n=70)        | N/A                                                                         | 12 months           | 46.3% improvement in YGTSS for the CM-group compared to 50.5% in the am-GPi group.                       |
| 2020               | Servello et al.         | 41 (76%)   | CM-Pf/Voi; vs am-GPi (n=14) | N/A                                                                         | 48 months           | Improvement of YGTSS in both groups, with better control in psychiatric symptoms in the am-GPi group.    |
| 2021               | Müller-Vahl et al.      | 9 (78%)    | CM-Voi; vs pvl-GPi          | 130 Hz / 0.2 V below adverse effects threshold / 210 us                     | 89.9 months         | No difference between CM-Voi DBS and pvl-GPi DBS. Various effects of stimulation on individual patients. |
| 2021               | Baldermann et al.       | 8 (75%)    | CM-Pf/Voi                   | N/A                                                                         | 12 months           | Various effects, including 44% improvement in YGTSS tic score.                                           |

**Legend:** CM = centromedian nucleus; CM-Pf = centromedian-parafascicular complex; N/A = not available; Spv = substantia periventricularis; Vo = ventralis-



*oralis*; *Voi* = ventralis-oralis internus; *RNS* = responsive neurostimulation; *YGSS* = Yale Global Tic Severity Scale; *pvl* = posteroventral lateral; *am* = anteromedial; *GPI* = globus pallidus internus.

#### 4. STUDIES ON ABLATION/DBS OF THE INTRALAMINAR THALAMUS IN DISORDERS OF CONSCIOUSNESS

##### 4.1 Ablation (focused ultrasound)

| Year | Authors     | n (% male) | Type of DOC | Target | Follow-up | Results                                                                                                                  |
|------|-------------|------------|-------------|--------|-----------|--------------------------------------------------------------------------------------------------------------------------|
| 2021 | Cain et al. | 3 (66%)    | MCS         | CM-Pf  | 6 months  | 1 patient short-term improvement of consciousness, 1 patient improved from MCS- to MCS+ and 1 patient showed no effects. |

**Legend:** *CM-Pf* = centromedian-parafascicular complex; *MCS* = minimally conscious state.

##### 4.2 DBS

| Year | Autho1rs       | n (% male) | Type of DOC | Target                    | Stimulation parameters  | Follow-up                                | Results                                                                                         |
|------|----------------|------------|-------------|---------------------------|-------------------------|------------------------------------------|-------------------------------------------------------------------------------------------------|
| 1968 | McLardy et al. | 1 (100%)   | UWS         | CM-Pf (as well)           | 250 Hz / N/A            | 1 month                                  | EEG modifications, but no effects on consciousness.                                             |
| 1979 | Sturm et al.   | 1 (100%)   | UWS         | Medial thalamus (as well) | 50 Hz / 6-10 V / 0.5 ms | 2 months                                 | (Short) improvement in spontaneous movements, verbal contacts and oral feeding.                 |
| 1984 | Cohadon et al. | 6 (N/A%)   | UWS         | CM                        | 50 Hz / 5-10 V / 0.5 ms | 2 months DBS (up to 2.5 years follow-up) | 3/6 patients no improvements. 3/6 patients return of oral feeding and contact with environment. |

|                                                                                                                                                                                                                                                                                               |                                   |                   |                     |                                        |                           |                                                       |                                                                                                                                                                                                                                      |
|-----------------------------------------------------------------------------------------------------------------------------------------------------------------------------------------------------------------------------------------------------------------------------------------------|-----------------------------------|-------------------|---------------------|----------------------------------------|---------------------------|-------------------------------------------------------|--------------------------------------------------------------------------------------------------------------------------------------------------------------------------------------------------------------------------------------|
| 1993                                                                                                                                                                                                                                                                                          | Cohadon & Richer                  | 25 (19 new; N/A%) | UWS                 | CM-Pf                                  | N/A                       | 2 months DBS (1-12 years follow-up)                   | 12/25 patients no effect. 13/25 patients improvement of spontaneous (eye) movements and (verbal) contact with surroundings.                                                                                                          |
| 1990/2005 <sup>17</sup>                                                                                                                                                                                                                                                                       | Tsubokawa et al./ Yamamoto et al. | 26 (N/A%)         | UWS (21)<br>MCS (5) | CM-Pf (24) and nucleus cuneiformis (2) | 25 Hz / N/A               | ±10 years                                             | 13/21 UWS patients no effect. 8/21 UWS patients recovery of oral feeding en (verbal) contact with surroundings. 4/5 MCS patients improvement of (verbal) contact with surroundings and emergence of bedridden state.                 |
| 2007                                                                                                                                                                                                                                                                                          | Schiff et al.                     | 1 (100%)          | MCS                 | CL                                     | 100 Hz / 4 V / N/A        | 6 months cross-over (follow-up >1 year after surgery) | Long-term return of arousal/awareness, oral feeding, speech/verbal contact and CRS-improvements (subscales).                                                                                                                         |
| 2016                                                                                                                                                                                                                                                                                          | Magrassi et al.                   | 3 (100%)          | UWS (1)<br>MCS (2)  | CM-Pf                                  | 80-110 Hz / N/A           | 18-60 months                                          | No return of full consciousness, though small improvements in CRS-scores (change of 2.33-3 at the end of follow-up).                                                                                                                 |
| 2016 <sup>18</sup>                                                                                                                                                                                                                                                                            | Adams et al.                      | 1 (100%)          | MCS                 | CL                                     | N/A                       | 60 months                                             | No significant change in CRS-R. Change in sleep dynamics.                                                                                                                                                                            |
| 2018                                                                                                                                                                                                                                                                                          | Chudy et al.                      | 14 (64%)          | UWS (10)<br>MCS (4) | CM-Pf                                  | 25 Hz / 2.5-3.5 V / 90 µs | 38-60 months                                          | 2/4 MCS patients regained consciousness/independence. 1/4 MCS patients regained consciousness, but still in wheelchair. 1/10 UWS patients showed some signs of consciousness. 3 patients died and rest (7/14) showed no improvement. |
| 2018                                                                                                                                                                                                                                                                                          | Lemaire et al.                    | 5 (40%)           | UWS (1)<br>MCS (4)  | CM-Pf                                  | 30 Hz / 4-6 V / 60 µs     | 11 months                                             | 1/1 UWS and 1/4 MCS patients showed a slight increase in mean CRS-R score.                                                                                                                                                           |
| <p><b>Legend:</b> CL = central lateral nucleus; CM = centromedian nucleus; CM-Pf = centromedian-parafascicular complex; EEG = Electroencephalography; CRS-R = coma recovery scale-revised; MCS = minimally conscious state; N/A = not available; UWS = unresponsive wakefulness syndrome.</p> |                                   |                   |                     |                                        |                           |                                                       |                                                                                                                                                                                                                                      |

## 5. STUDIES ON ABLATION/DBS OF THE INTRALAMINAR THALAMUS IN MOVEMENT DISORDERS

### 5.1 Ablation (lesion electrode)

| Year                                                                                                                   | Authors          | Type                                             | n (% male) | Target                | Follow-up                       | Results                                                                                                                                                                                     |
|------------------------------------------------------------------------------------------------------------------------|------------------|--------------------------------------------------|------------|-----------------------|---------------------------------|---------------------------------------------------------------------------------------------------------------------------------------------------------------------------------------------|
| 1963                                                                                                                   | Markham & Rand   | PD                                               | 9 (N/A%)   | Centromedian thalamus | 6 months - 5 years              | N/A (not specified).                                                                                                                                                                        |
| 1965                                                                                                                   | Adams & Rutkin   | PD (unilateral/bilateral tremor)                 | 26 (62%)   | Centromedian thalamus | Variable (on average >3 months) | Majority of patients with unilateral disease have excellent (free of tremor) or good result (mild tremor). Majority of patients with bilateral disease obtained good results (mild tremor). |
| 1984                                                                                                                   | Vasin et al.     | PD (severe akinesia)                             | 15 (N/A%)  | Centromedian thalamus | N/A                             | 3/15 marked improvement of motor/speech function. 5/15 minor improvements of motor function. 2/15 no effects. 2/15 increase of akinesia. 3/15 no ablation (after stimulation).              |
| 1996                                                                                                                   | Jeanmonod et al. | Various (including Parkinson/ cerebellar tremor) | 22 (N/A%)  | Medial thalamus       | ±18 months                      | 50-100% relief of symptoms as tremor, rigidity, and bradykinesia in 43% of patients, but limited decrease in overall mean UPDRS (mean change from 47 to 37).                                |
| <p><b>Legend:</b> N/A = not available; PD = Parkinson's Disease; UPDRS = Unified Parkinson's Disease Rating Scale.</p> |                  |                                                  |            |                       |                                 |                                                                                                                                                                                             |

### 5.2 DBS

| Year | Authors | Type | n (% male) | Target | Stimulation parameters (reported) | Follow-up | Results |
|------|---------|------|------------|--------|-----------------------------------|-----------|---------|
|------|---------|------|------------|--------|-----------------------------------|-----------|---------|

|      |                                              |                                                                 |                    |       |                                                                |                              |                                                                                                                                              |
|------|----------------------------------------------|-----------------------------------------------------------------|--------------------|-------|----------------------------------------------------------------|------------------------------|----------------------------------------------------------------------------------------------------------------------------------------------|
| 1980 | Andy et al.                                  | PD, spasticity, and (cervical) dystonia (in patients with pain) | 4 (25%)            | CM-Pf | 125 Hz / 7-8 V / 0.5 ms and 75 Hz / 4 V / 0.4 ms               | N/A                          | Variable stimulation induced reduction of tremor, rigidity, and dyskinesia.                                                                  |
| 2002 | Krauss et al.                                | Tremor/dyskinesia (in patients with pain)                       | 3 (66%)            | CM-Pf | 130 Hz / Variable amplitude / 180-210 $\mu$ s                  | 0, 1 and 2 years             | Considerable improvement of tremor/dyskinesia in 2/3 patients.                                                                               |
| 2006 | Mazzone et al.                               | PD                                                              | 6 (N/A%)           | CM-Pf | 185 Hz / 1.5-2.5 V / 90 $\mu$ s                                | N/A                          | Slightly effective in reducing rigidity and akinesia, but more effect on freezing (significantly better when combined with regular GPi DBS). |
| 2008 | Peppe et al.                                 | PD                                                              | 2 (0%)             | CM-Pf | 185 Hz / 1.8-3.1 V (monopolar) or 2-3 V (bipolar)              | N/A                          | Very effective in reducing hand tremor.                                                                                                      |
| 2009 | Stefani et al. (follow-up of Mazzone et al.) | PD                                                              | 8 (13 total, N/A%) | CM-Pf | 185 Hz / 1.5–2.5 V (monopolar) or 2-3 V (bipolar) / 90 $\mu$ s | Varies (8 patients >3 years) | Variable stimulation induced reduction in tremor and dyskinesia (next to regular STN or GPi DBS).                                            |

**Legend:** CM-Pf = centromedian-parafascicular complex; GPi = internal globus pallidus; PD = Parkinson's disease; STN = subthalamic nucleus; N/A = not available.

## **SUPPLEMENTAL REFERENCES (NOT IN MAIN MANUSCRIPT)**

1. Niizuma, H., Kwak, R., Ikeda, S., Ohyama, H., Suzuki, J. and Saso, S. (1982). Follow-up Results of Centromedian Thalamotomy for Central Pain. *Appl Neurophysiol* 45, 324-325.
2. Young, R.F. (1996). Functional neurosurgery with the Leksell Gamma Knife. *Stereot Funct Neuros* 66, 19-23.
3. Jeanmonod, D., Magnin, M., Morel, A. and Siegemund, M. (2001). Surgical control of the human thalamocortical dysrhythmia: I. Central lateral thalamotomy in neurogenic pain. *Thalamus & Related Systems* 1, 71-79.
4. Boethius, J., Lindblom, U., Meyerson, B. and Widen, L. (1976). Effects of multifocal brain stimulation on pain and somatosensory functions. In: *Sensory Functions of the Skin in Primates*. Elsevier, pps. 531-548.
5. Thoden, U., Doerr, M., Dieckmann, G. and Krainick, J.U. (1979). Medial Thalamic Permanent Electrodes for Pain Control in Man - Electro-Physiological and Clinical-Study. *Electroen Clin Neuro* 47, 582-591.
6. Andy, O.J. (1983). Thalamic-Stimulation for Chronic Pain. *Appl Neurophysiol* 46, 116-123.
7. Krauss, J., Pohle, T., Weigel, R. and Kalbarczyk, A. (2001). Somatosensory thalamic stimulation versus center median-parafascicular complex stimulation in 11 patients with neuropathic pain. *Stereotact Funct Neurosurg* 77, 194.
8. Hollingworth, M., Sims-Williams, H.P., Pickering, A.E., Barua, N. and Patel, N.K. (2017). Single Electrode Deep Brain Stimulation with Dual Targeting at Dual Frequency for the Treatment of Chronic Pain: A Case Series and Review of the Literature. *Brain Sci* 7.
9. Velasco, F., Velasco, M., Ogarrio, C. and Fanghanel, G. (1987). Electrical-Stimulation of the Centromedian Thalamic Nucleus in the Treatment of Convulsive Seizures - a Preliminary-Report. *Epilepsia* 28, 421-430.

10. Maciunas, R.J., Maddux, B.N., Riley, D.E., Whitney, C.M., Schoenberg, M.R., Ogrocki, P.J., Albert, J.M. and Gould, D.J. (2007). Prospective randomized double-blind trial of bilateral thalamic deep brain stimulation in adults with Tourette syndrome. *J Neurosurg* 107, 1004-1014.
11. Welter, M.L., Mallet, L., Houeto, J.L., Karachi, C., Czernecki, V., Cornu, P., Navarro, S., Pidoux, B., Dormont, D., Bardinet, E., Yelnik, J., Damier, P. and Agid, Y. (2008). Internal pallidal and thalamic stimulation in patients with Tourette syndrome. *Arch Neurol-Chicago* 65, 952-957.
12. Servello, D., Porta, M., Sassi, M., Brambilla, A. and Robertson, M.M. (2008). Deep brain stimulation in 18 patients with severe Gilles de la Tourette syndrome refractory to treatment: the surgery and stimulation. *J Neurol Neurosur Ps* 79, 136-142.
13. Ackermans, L., Duits, A., Temel, Y., Winogrodzka, A., Peeters, F., Beuls, E.A.M. and Visser-Vandewalle, V. (2010). Long-term outcome of thalamic deep brain stimulation in two patients with Tourette syndrome. *J Neurol Neurosur Ps* 81, 1068-1072.
14. Ackermans, L., Duits, A., van der Linden, C., Tijssen, M., Schruers, K., Temel, Y., Kleijer, M., Nederveen, P., Bruggeman, R., Tromp, S., van Kranen-Mastenbroek, V., Kingma, H., Cath, D. and Visser-Vandewalle, V. (2011). Double-blind clinical trial of thalamic stimulation in patients with Tourette syndrome. *Brain* 134, 832-844.
15. Savica, R., Stead, M., Mack, K.J., Lee, K.H. and Klassen, B.T. (2012). Deep Brain Stimulation in Tourette Syndrome: A Description of 3 Patients With Excellent Outcome. *Mayo Clin Proc* 87, 59-62.
16. Okun, M.S., Foote, K.D., Wu, S.S., Ward, H.E., Bowers, D., Rodriguez, R.L., Malaty, I.A., Goodman, W.K., Gilbert, D.M., Walker, H.C., Mink, J.W., Merritt, S., Morishita, T. and Sanchez, J.C. (2013). A Trial of Scheduled Deep Brain Stimulation for Tourette Syndrome Moving Away From Continuous Deep Brain Stimulation Paradigms. *Jama Neurol* 70, 85-94.

17. Yamamoto, T., Kobayashi, K., Kasai, M., Oshima, H., Fukaya, C. and Katayama, Y. (2005). DBS therapy for the vegetative state and minimally conscious state. In: *Re-Engineering of the Damaged Brain and Spinal Cord*. Springer, pps. 101-104.
18. Adams, Z.M., Forgacs, P.B., Conte, M.M., Nauvel, T.J., Drover, J.D. and Schiff, N.D. (2016). Late and progressive alterations of sleep dynamics following central thalamic deep brain stimulation (CT-DBS) in chronic minimally conscious state. *Clin Neurophysiol* 127, 3086-3092.
